# Supplementary material for: Human C-terminal CUBN variants associate with chronic proteinuria and normal renal function
Source: JCI journal article supplement (doi:10.1172/jci129937), 2019-10-15
Supplement: sd2 [file 2]

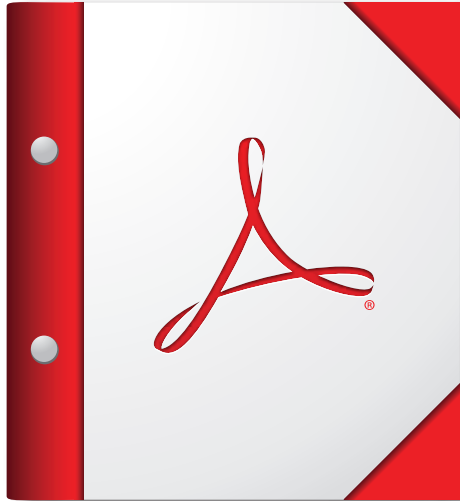

**For the best experience, open this PDF portfolio in  
Acrobat 9 or Adobe Reader 9, or later.**

[Get Adobe Reader Now!](#)
